# Supplementary material for: Rfam 13.0: shifting to a genome-centric resource for non-coding RNA families
Source: Oxford University Press journal article supplement (doi:10.1093/nar/gkx1038), 2017-10-19
Supplement: gkx1038_supp.zip [file gkx1038_supp.zip]

**Supplementary Information Table 1. Changes in Rfam family names and descriptions in release 13.0**

| <b>Rfam accession</b> | <b>New ID</b>     | <b>Old ID</b> | <b>New Description</b>         | <b>Reference</b>              |
|-----------------------|-------------------|---------------|--------------------------------|-------------------------------|
| RF01404               | PinT              | STnc440       | PinT (STnc440) Hfq binding RNA | PMID <a href="#">26789254</a> |
| RF00111               | SdsR_RyeB         | RyeB          | SdsR_RyeB RNA                  | PMID <a href="#">22180532</a> |
| RF00115               | McaS              | IS061         | McaS/IsrA RNA                  | PMID <a href="#">22289118</a> |
| RF00442               | ykkC-yxkD         | ykkC-yxkD     | Guanidine-I*                   | PMID <a href="#">27989440</a> |
| RF01068               | mini-ykkC         | mini-ykkC     | Guanidine-II*                  | PMID <a href="#">28001368</a> |
| RF01763               | ykkC-III          | ykkC-III      | Guanidine-III*                 | PMID <a href="#">28001372</a> |
| RF01734               | Fluoride          | CrcB          | Fluoride riboswitch            | PMID <a href="#">22194412</a> |
| RF01750               | ZMP_ZTP           | Pfl           | ZMP/ZTP riboswitch             | PMID <a href="#">25616067</a> |
| RF01482               | AdoCbl riboswitch | Rli55         | AdoCbl riboswitch              | PMID <a href="#">25794617</a> |

\* - only description was updated
